# Supplementary material for: Observation of quantum-confined exciton states in monolayer WS2 quantum dots by ultrafast spectroscopy
Source: Royal Society of Chemistry journal article supplement (doi:10.1039/d1nr04868f), 2021-01-01
Supplement: d1nr04868f1.pdf [file d1nr04868f1.pdf]

## Supporting Information

# Observation of quantum-confined exciton states in monolayer WS<sub>2</sub> quantum dots by ultrafast spectroscopy

*Shu-Wen Zheng,<sup>a</sup> Lei Wang,<sup>\*a</sup> Hai-Yu Wang,<sup>\*a</sup> Chen-Yu Xu<sup>a</sup>, Yang Luo<sup>c</sup> and Hong-Bo Sun<sup>b</sup>*

a. State Key Laboratory of Integrated Optoelectronics, College of Electronic Science and Engineering, Jilin University, 2699 Qianjin Street, Changchun 130012, China.

b. State Key Laboratory of Precision Measurement Technology and Instruments, Department of Precision Instrument, Tsinghua University, Haidian, Beijing 100084, China.

c. Changchun Institute of Optics, Fine Mechanics and Physics, Chinese Academy of Sciences, Changchun 130033, China

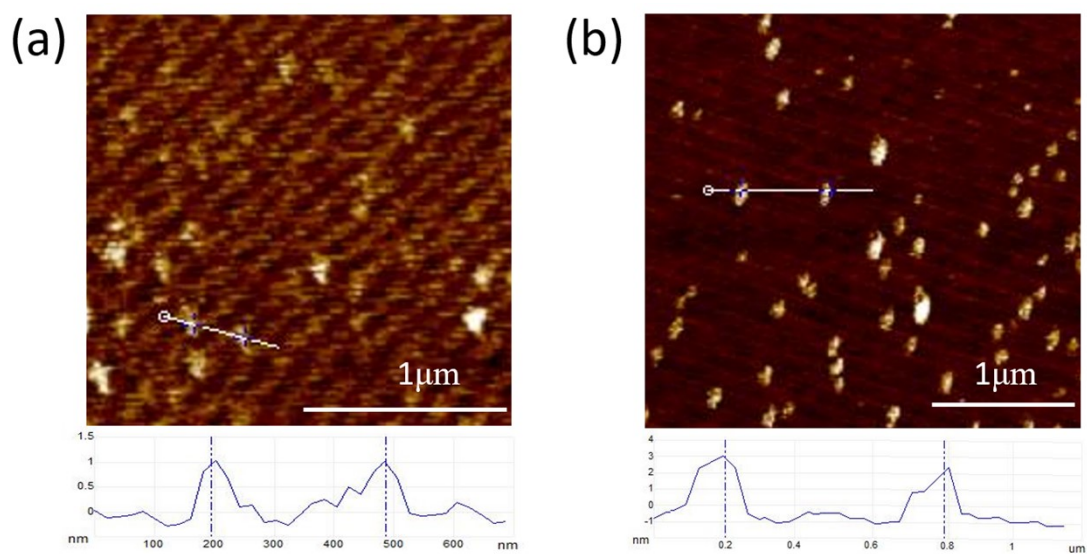

Figure S1. AFM images of (a) monolayer WS<sub>2</sub> QDs and (b) WS<sub>2</sub> nanosheets.

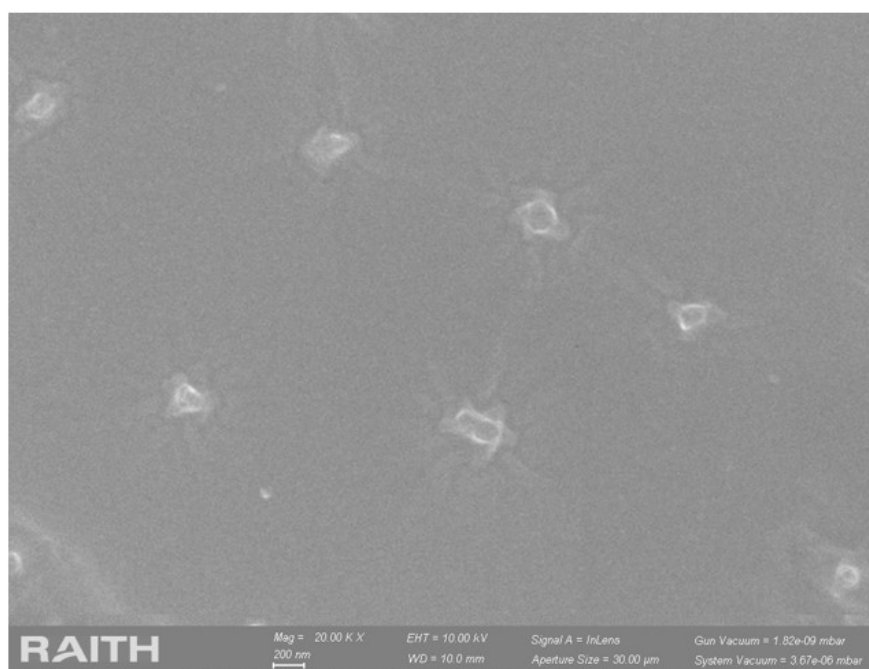

Figure S2. SEM image of WS<sub>2</sub> nanosheets.

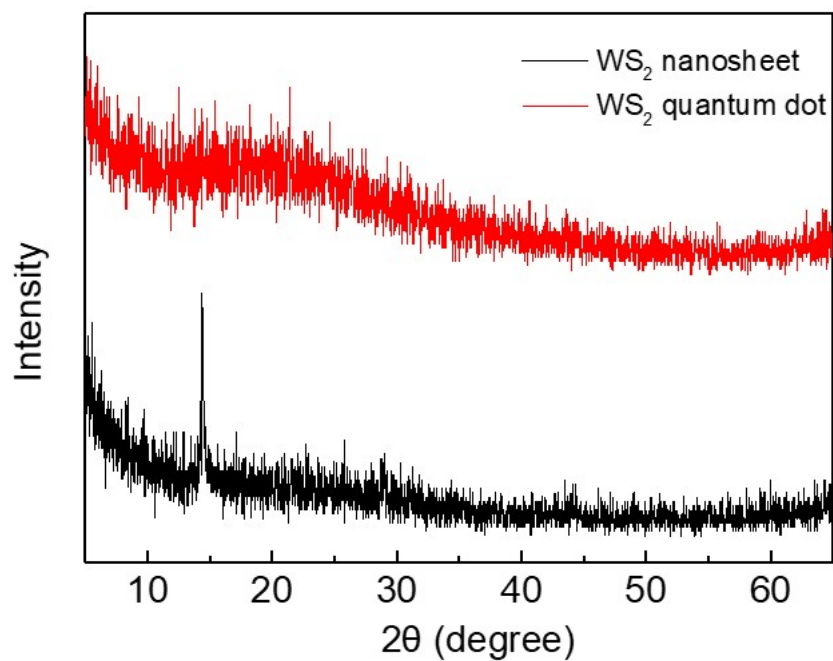

Figure S3. XRD patterns of monolayer WS<sub>2</sub> QDs and WS<sub>2</sub> nanosheets.

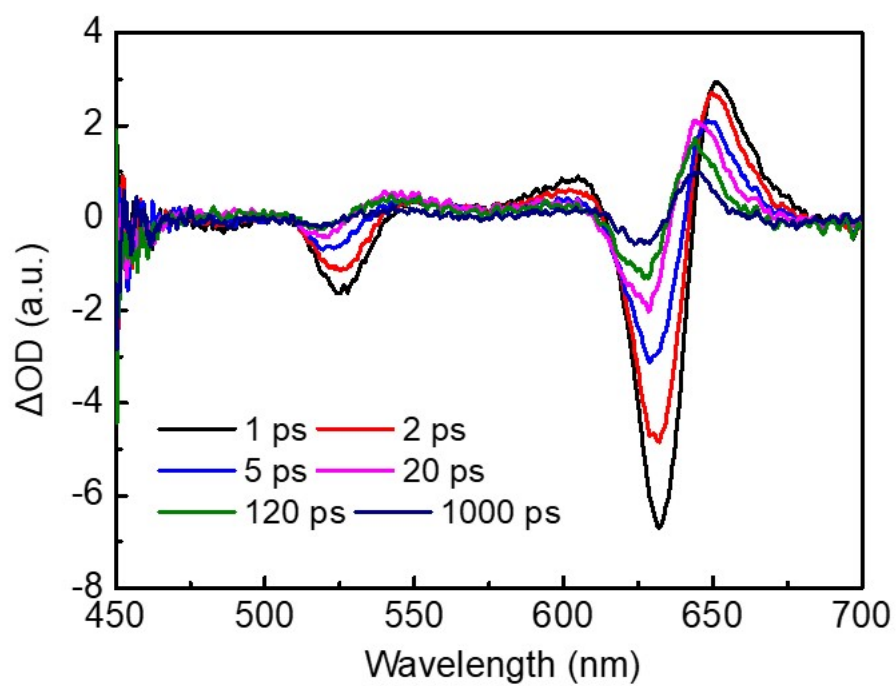

Figure S4. TA spectra of WS<sub>2</sub> nanosheets under 610 nm excitation at different delay times.

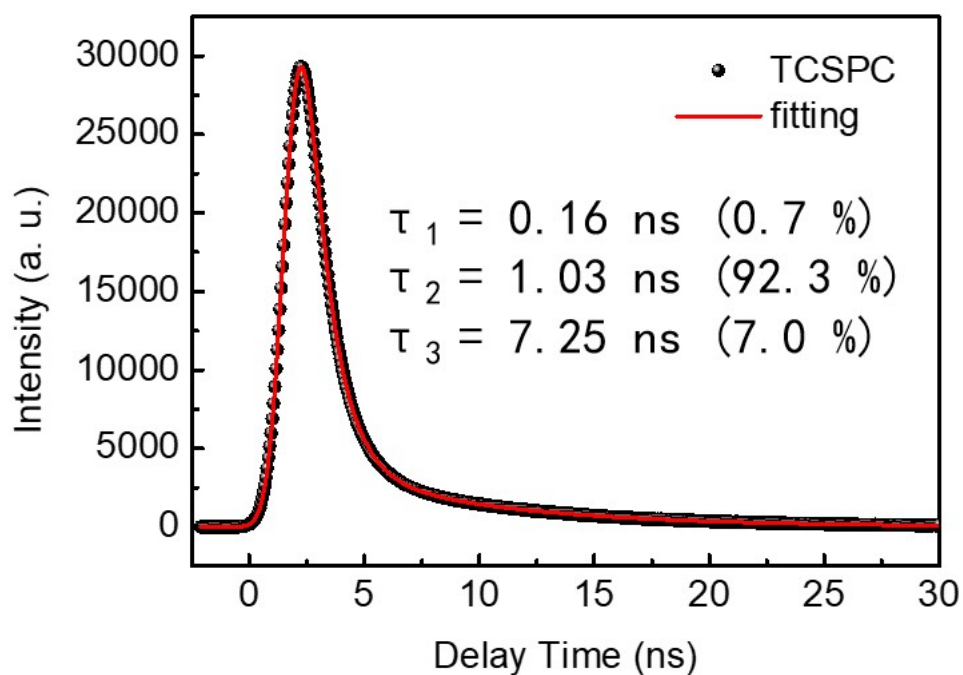

Figure S5 Time-resolved PL dynamics of monolayer WS<sub>2</sub> QDs measured by time-correlated single photon counting (TCSPC; the excitation wavelength is 430 nm, and the probe wavelength is 500 nm).

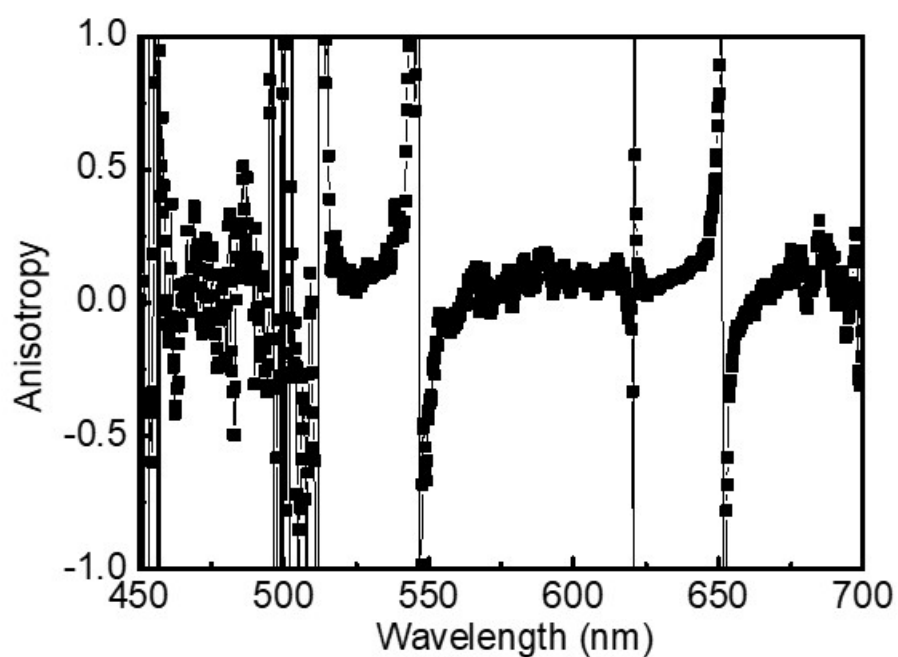

Figure S6. Anisotropic spectra of WS<sub>2</sub> nanosheets probed at 0.28 ps.

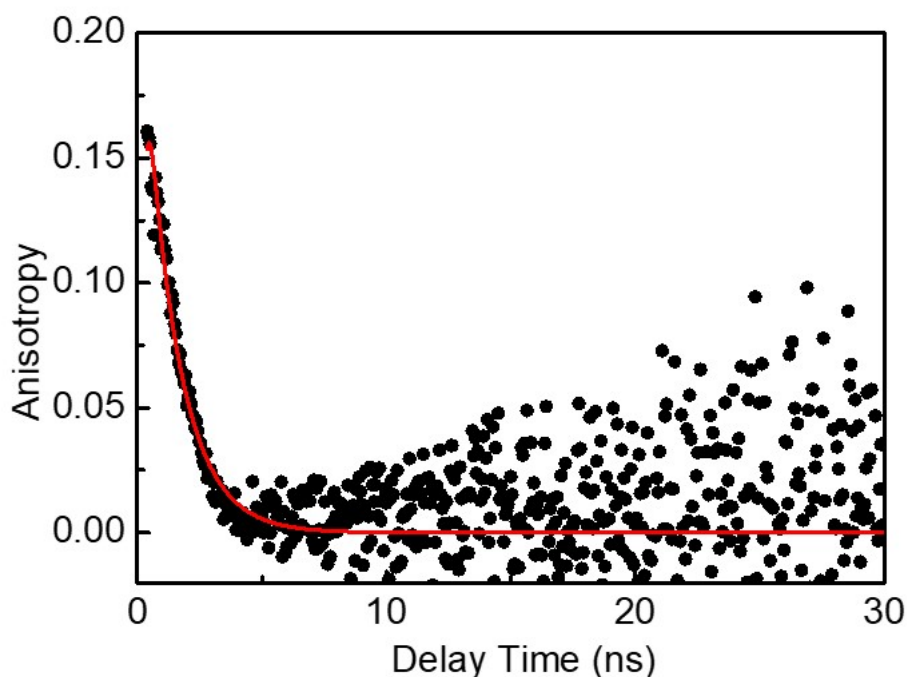

Figure S7 Time-resolved PL anisotropy dynamics of monolayer WS<sub>2</sub> QDs measured by TCSPC (the excitation wavelength is 430 nm, and the probe wavelength is 500 nm). It gives a rotational diffusion time ( $\tau_{\text{rot}}$ ) of 1.3 ns. According to the equation  $\tau_{\text{rot}} = \eta V / k_B T$ , where  $\eta$  is the viscosity,  $V$  is the volume of the rotating unit,  $k_B$  is the Boltzmann constant and  $T$  is temperature. At room temperature,  $\eta$  is 1.86 mPa·s for NMP,<sup>1</sup>  $k_B T \sim 26$  meV. Assuming that rotational diameter is cube root of  $V$ , the resulted rotational diameter is  $\sim 1.4$  nm for monolayer WS<sub>2</sub> QDs. It is consistent with the average height ( $\sim 1$  nm) of monolayer WS<sub>2</sub> QDs. This indicates the effective volume of the rotating unit is relative to the lateral thickness of monolayer WS<sub>2</sub> QDs, suggesting a pure rotation process in slip case. Noting that the calculated rotational diameter is slightly larger than the physical thickness of monolayer WS<sub>2</sub> QDs, it may reflect that the solvent molecules (NMP) could be involved with the rotational diffusion behavior of monolayer WS<sub>2</sub> QDs, implying the potential influence of solvent-QD interactions.

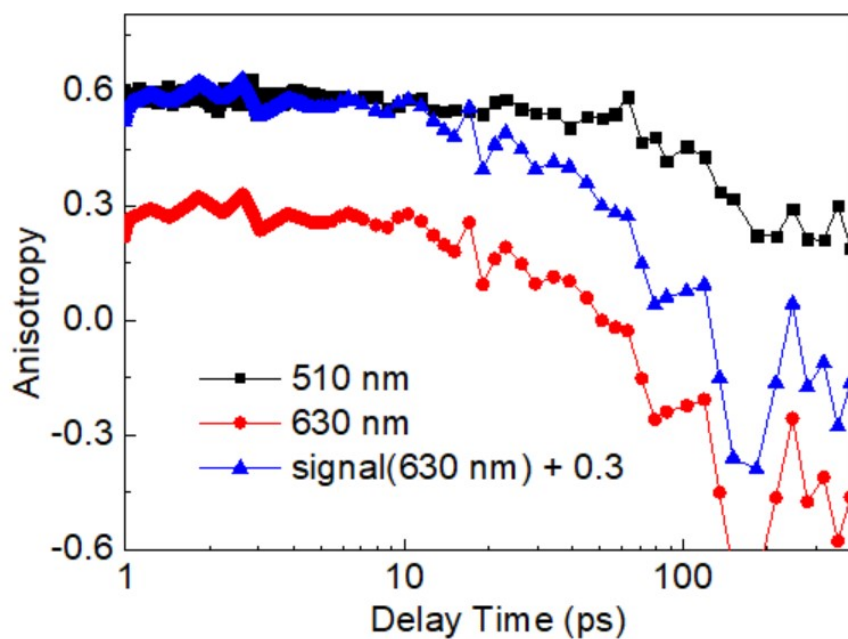

Figure S8. Anisotropic dynamics of monolayer WS<sub>2</sub> QDs under 520 nm excitation and probe at 510 nm (black line) and 630 nm (red line). The blue line is obtained from the method that lifting up the original anisotropic dynamics signals at 630 nm by a value of 0.3.

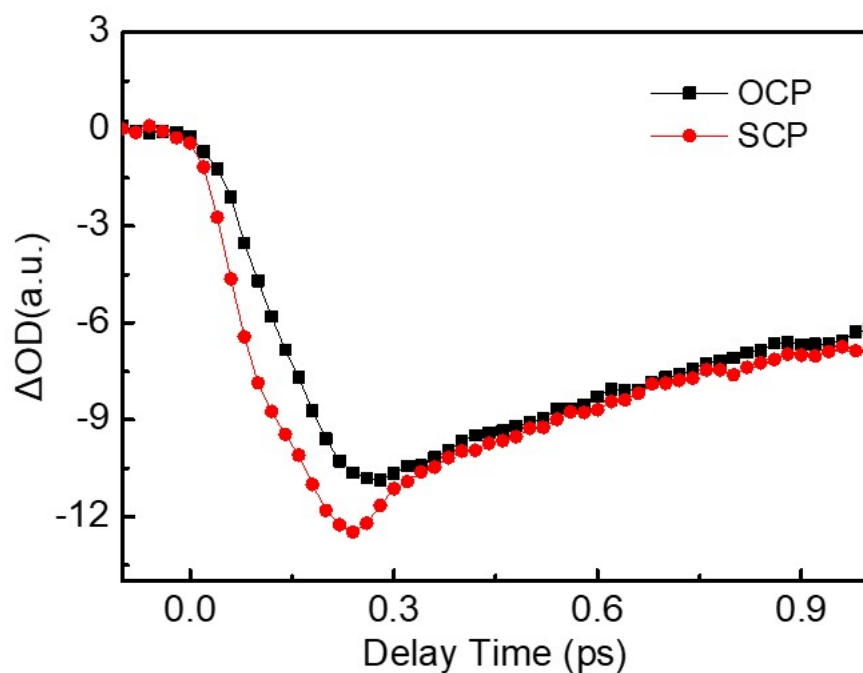

Figure S9. The SCP and OCP dynamics of A-exciton for WS<sub>2</sub> nanosheets probed at 634 nm.

**Table S1.** Best-fitted parameters for dynamics of exciton decay of monolayer WS<sub>2</sub> QDs and WS<sub>2</sub> nanosheets with a function of  $I(t) \propto \sum_i A_i \exp(-t/\tau_i)$ .

|                             | $\tau_1$ (ps) | $\tau_2$ (ps) | $\tau_3$ (ps) |
|-----------------------------|---------------|---------------|---------------|
| WS <sub>2</sub> QDs (470ex) | 1.4 (37%)     | 12 (50%)      | 184 (13%)     |
| WS <sub>2</sub> QDs (570ex) | 1.8 (39%)     | 13.8 (46%)    | 199 (15%)     |
| WS <sub>2</sub> QDs (610ex) | 0.95 (37%)    | 9.6 (50%)     | 247 (13%)     |
| WS <sub>2</sub> nanosheets  | 0.57 (46%)    | 4.9 (41%)     | 703(13%)      |

## Reference

1. A. García-Abuín, D. Gomez-Díaz, M. D. La Rubia, and J. M. Navaza. *J. Chem. Eng. Data*. 2011, **56**, 646–651.
